# Supplementary material for: Identification of unique bile acid-metabolizing bacteria from the microbiome of centenarians
Source: Research Square preprint supplement (doi:10.21203/rs.3.rs-115113/v1), 2020-12-02
Supplement: Supplementary file 1 [file 4199a93fac9cb6d8cf94d92d.xlsx]

## Sheet: Sheet1
Table S1: Characteristics of centenarian, elderly, and young participants
		Centenarians (n = 160)	Elderly (n = 112)	Young (n = 39)	Lineal descendants and siblings of centenarians (n = 22)
Age (years)		106.95±2.56	86.42±1.31	31.05±9.37	74.68±11.62
Female, No. (%)		146 (91.25)	54 (48.21)	8 (20)	11 (50)
Residence, No. (%)
	Home	15 (9.38)	112 (100)	39 (97.5)
	Nursing home	136 (85.00)	0 (0)	0 (0)
	Hospital	9 (5.62)	0 (0)	0 (0)
Height (meter)		1.44±0.08	1.54±0.09	1.69±0.08
Weight (kilogram)		39.6±7.43	54.95±9.74	62±10.74
Body mass index, BMI score		19.35±3.47	23.07±3.06	21.64±2.67
Systolic blood pressure (mmHg)		133.10±22.63	142±16.74
Diastolic blood pressure (mmHg)		71.44±15.23	74.42±11.02
Pulse (beats/min)		74.23±12.29	73.95±11.52
Activities of daily living, ADL score		27.5±26.02	98.79±3.3	100±0
Mini-mental state examination, MMSE score		12.76±8.13	26.14±2.85
Blood tests
	Total protein (g/dL)	6.65±0.63	7.26±0.4	7.39±0.58
	Albumin (g/dL)	3.33±0.43	4.2±0.31	4.65±0.16
	Total cholesterol (mg/dL)	172.10±32.74	196.29±32.24
	Triglycerides (mg/dL)	106.16±47.88	132.9±79.39
	High density lipoprotein cholesterol (mg/dL)	47.79±11.88	61.16±16.75
	Low density lipoprotein cholesterol (mg/dL)	96.86±26.84	108.22±24.44
	Fasting blood glucose (mg/dL)	108.24±30.81	110.71±43.09	84.88±10.41
	Haemoglobin A1c (%)	5.60±0.54	5.95±0.58
	C-reactive protein (mg/dL)	0.47±0.82	0.21±0.67	0.05±0.06
	Aspartate aminotransferase (U/L)	22.01±6.70	25.57±9.49	20.1±5.22
	Alanine aminotransferase (U/L)	11.50±5.42	18.57±11.41	15.41±5.04
	Lactate dehydrogenase (U/L)	200.65±44.24	198.94±38.07
	Gamma-glutamyl transpeptidase (U/L)	16.70±10.99	26.19±21.42	15.75±4.74
	Cholinesterase (U/L)	198.87±58.79	299.91±60.54
	Creatinine (mg/dL)	0.88±0.37	0.87±0.31	0.61±0.09
	Uric acid (mg/dL)	5.53±1.54	5.41±1.32	4.03±0.93
	Blood urea nitrogen (mg/dL)	23.45±11.28	19.07±5.73	11.73±2.42
	White blood cell count (x10^3 cells/mL)	5.36±1.50	5.15±1.35	5.48±1.35
	Red blood cell count (x10^4 cells/mL)	372.89±52.99	422.71±42.26	508.6±37.97
	Platelet count (x10^4 cellsl/mL)	21.27±7.68	21.24±4.15	24.91±5.64
	Haemoglobin (g/dL)	11.44±1.68	13.05±1.41	15.29±1.2
	Haematocrit (%)	34.78±4.70	39.58±4.02	45.96±2.85
	Mean corpuscular volume (fL)	93.59±6.10	93.73±4.36	90.53±4.55
Medical history, No. (%)
	Cerebrovascular disease	30 (18.87)	10 (9.01)	0 (0)
	Myocardial infarction	2 (1.27)	0 (0)	0 (0)
	Angina	17 (10.69)	10 (9.01)	0 (0)
	Haematological disorder/disease	2 (1.27)		0 (0)
	Parkinson's disease	0 (0)	0 (0)	0 (0)
	Collagen disease	5 (3.16)	3 (2.68)	0 (0)
	Asthma	4 (2.55)	7 (6.36)	1 (2.56)
	Pneumonia	29 (18.47)	5 (4.55)	0 (0)
	Respiratory disease	15 (9.55)	18 (16.36)	0 (0)
	Bone fractures	111 (69.81)	31 (27.68)	0 (0)
	High blood pressure	65 (41.40)	80 (71.43)	2 (5.13)
	Diabetes mellitus	8 (5.06)	10 (9.01)	0 (0)
	Renal disease	11 (7.01)	12 (10.71)	0 (0)
	Cancer	19 (12.03)	18 (16.07)	0 (0)
	Gastrointestinal disease	58 (36.48)	78 (69.64)	0 (0)
Positive faecal occult blood test, No. (%)		3 (6.67)	9 (8.04)	1 (4.35)
	Data are presented as mean±SD or No. (%)
