# Supplementary material for: Identification of unique bile acid-metabolizing bacteria from the microbiome of centenarians
Source: Research Square preprint supplement (doi:10.21203/rs.3.rs-115113/v1), 2020-12-02
Supplement: Supplementary file 3 [file 94bb60dcc7e586784636d931.xlsx]

## Sheet: Sheet1
Table S3: The information of genome and 16S rRNA gene sequence of 68 CE91-derived iosolates
Strain number	Strain name	Genome assembly statistics								16S rRNA gene sequence similarity			Assignments using 40 universal single copy marker genes
		Number of contigs	Number of plasmids (<1 Mbase)	N50 (bp)	Total assembly length (bp)	Longest chromosome contig length (bp)	Completeness (%)	Contamination (%)	Strain heterogeneity (%)	Accession no.	Closest species	Similarity (%)	Accession no.	Closest species	Similarity (%)
1	Parabacteroides goldsteinii St1	11	3	3785594	7471346	3785594	99.62	0.77	0	NR_113076.1	Parabacteroides goldsteinii DSM 19448	98.305	GCA_003463685.1	Parabacteroides sp. AM58-2XD	99.95
2	Parabacteroides goldsteinii St2	66	5	3754375	7473532	3754375	99.62	0.77	0	NR_113076.1	Parabacteroides goldsteinii DSM 19448	98.305	GCA_003463685.1	Parabacteroides sp. AM58-2XD	99.95
3	Parabacteroides merdae St3	38	0	1065856	5202462	1065856	99.62	0.58	0	NR_041343.1	Parabacteroides merdae JCM 9497	100	GCA_000154105.1	Parabacteroides merdae ATCC 43184	100
4	Parabacteroides distasonis St4	35	0	2759194	4807766	2759194	93.65	0.38	0	NR_074376.1	Parabacteroides distasonis ATCC 8503	99.327	GCA_000307455.1	Parabacteroides distasonis CL03T12C09	100
5	Parabacteroides distasonis St5	37	0	2759118	4804932	2759118	93.65	0.38	0	NR_074376.1	Parabacteroides distasonis ATCC 8503	99.327	GCA_000307455.1	Parabacteroides distasonis CL03T12C09	100
6	Bacteroides dorei St6	10	6	5734105	5817815	5734105	99.25	0.75	0	NR_041351.1	Bacteroides dorei strain 175	99.866	GCA_004347605.1	Bacteroides dorei	100
7	Bacteroides dorei St7	10	6	5743537	5817315	5743537	99.25	0.75	0	NR_041351.1	Bacteroides dorei strain 175	99.866	GCA_004347605.1	Bacteroides dorei	100
8	Bacteroides thetaiotaomicron St8	5	4	6133357	6222927	6133357	99.41	0.08	0	NR_074277.1	Bacteroides thetaiotaomicron strain VPI-5482	99.729	GCA_900109385.1	Bacteroides thetaiotaomicron	99.97
9	Bacteroides thetaiotaomicron St9	29	4	1723722	6262108	2144825	99.41	0.08	0	NR_074277.1	Bacteroides thetaiotaomicron strain VPI-5482	99.729	GCA_900109385.1	Bacteroides thetaiotaomicron	99.97
10	Bacteroides uniformis St10	3	2	4531993	4687058	4531993	99.26	0.68	0	NR_112945.1	Bacteroides uniformis JCM 5828	100	GCA_003603955.1	Bacteroides sp. AF36-11BH	100
11	Bacteroides uniformis St11	3	2	4531993	4687058	4531993	99.26	0.68	0	NR_112945.1	Bacteroides uniformis JCM 5828	100	GCA_003603955.1	Bacteroides sp. AF36-11BH	100
12	Bacteroides uniformis St12	2	1	4833723	4839343	4833723	99.26	0.56	0	NR_112945.1	Bacteroides uniformis JCM 5828	99.661	GCA_002161435.1	Bacteroides uniformis	99.98
13	Bacteroides uniformis St13	2	1	4833708	4839328	4833708	99.26	0.56	0	NR_112945.1	Bacteroides uniformis JCM 5828	99.661	GCA_002161435.1	Bacteroides uniformis	99.98
14	Porphyromonas somerae St14	1	0	2727503	2727503	2727503	99.74	0.08	0	NR_113090.1	Porphyromonas somerae DSM 23386	99.865	GCA_000372405.1	Porphyromonas somerae DSM 23386	98.8
15	Alistipes finegoldii St15	1	0	4117255	4117255	4117255	100	0	0	NR_102944.1	Alistipes finegoldii DSM 17242	99.735	GCA_000265365.1	Alistipes finegoldii DSM 17242	99.59
16	Alistipes finegoldii St16	10	0	2819844	4115407	2819844	100	0	0	NR_102944.1	Alistipes finegoldii DSM 17242	99.735	GCA_000265365.1	Alistipes finegoldii DSM 17242	99.59
17	Alistipes onderdonkii St17	10	0	3270561	3812145	3270561	99.28	0.48	0	NR_113151.1	Alistipes onderdonkii JCM 16771	100	GCA_000374505.1	Alistipes onderdonkii WAL 8169 = DSM 19147	99.92
18	Alistipes onderdonkii St18	1	0	3812179	3812179	3812179	99.28	0	0	NR_113151.1	Alistipes onderdonkii JCM 16771	100	GCA_000374505.1	Alistipes onderdonkii WAL 8169 = DSM 19147	99.92
19	Odoribacter laneus St19	31	0	1085539	3976336	1618042	100	0	0	NR_113074.1	Odoribacter laneus YIT 12061	99.73	GCA_000243215.1	Odoribacter laneus YIT 12061	99.74
20	Odoribacter laneus St20	26	0	3250020	3971206	3250020	100	0	0	NR_113074.1	Odoribacter laneus YIT 12061	99.73	GCA_000243215.1	Odoribacter laneus YIT 12061	99.74
21	Odoribacteraceae St21	1	0	5743229	5743229	5743229	99.46	0	0	NR_126194.1	Butyricimonas faecihominis strain 180-3	97.842	GCA_900538505.1	uncultured Butyricimonas sp.	100
22	Odoribacteraceae St22	16	0	3189696	5730157	3189696	99.46	0	0	NR_126194.1	Butyricimonas faecihominis strain 180-3	97.842	GCA_900538505.1	uncultured Butyricimonas sp.	100
23	Odoribacteraceae St23	4	0	5647541	5746862	5647541	99.46	0	0	NR_126194.1	Butyricimonas faecihominis strain 180-3	97.842	GCA_900538505.1	uncultured Butyricimonas sp.	100
24	Odoribacteraceae St24	19	0	2871227	5706421	2871227	99.46	0	0	NR_126194.1	Butyricimonas faecihominis strain 180-3	97.842	GCA_900538505.1	uncultured Butyricimonas sp.	100
25	Campylobacter ureolyticus St25	2	1	1838906	1863330	1838906	98.95	0.44	0	NR_118654.1	Campylobacter ureolyticus ATCC 33387	99.036	GCA_002847805.1	Campylobacter ureolyticus	98.15
26	Akkermansia muciniphila St26	3	2	3176095	3217069	3176095	97.96	0.68	0	NR_074436.1	Akkermansia muciniphila ATCC BAA-835	99.203	GCA_002885055.1	Akkermansia muciniphila	100
27	Akkermansia muciniphila St27	2	1	3195234	3229822	3195234	97.96	0.68	0	NR_074436.1	Akkermansia muciniphila ATCC BAA-835	99.203	GCA_002885055.1	Akkermansia muciniphila	100
28	Pyramidobacter piscolens St28	1	0	2686623	2686623	2686623	100	0	0	NR_113185.1	Pyramidobacter piscolens W5455	99.797	GCA_000177335.1	Pyramidobacter piscolens W5455	99.72
29	Corynebacterium striatum St29	2	1	2755330	2766266	2755330	99.67	0.4	16.67	NR_037041.1	Corynebacterium striatum strain Minnett	99.323	GCA_900447675.1	Corynebacterium striatum	99.53
30	Raoultibacter timonensis St30	1	0	4016902	4016902	4016902	100	0	0	NR_148574.1	Raoultibacter timonensis strain Marseille-P3277	99.932	GCA_900240215.1	Raoultibacter timonensis	99.41
31	Raoultibacter timonensis St31	1	0	4016621	4016621	4016621	100	0	0	NR_148574.1	Raoultibacter timonensis strain Marseille-P3277	99.932	GCA_900240215.1	Raoultibacter timonensis	99.41
32	Gordonibacter pamelaeae St32	2	1	3447088	3450858	3447088	100	0.27	0	NR_102934.1	Gordonibacter pamelaeae 7-10-1-b	98.999	GCA_000210055.1	Gordonibacter pamelaeae 7-10-1-b	99.67
33	Eggerthella lenta St33	1	0	3378174	3378174	3378174	100	1.01	0	NR_074377.1	Eggerthella lenta strain DSM 2243	98.932	GCA_003340405.1	Eggerthella lenta	99.99
34	Eggerthella lenta St34	3	1	2528793	3551970	2528793	100	0	0	NR_074377.1	Eggerthella lenta strain DSM 2243	100	GCA_003340005.1	Eggerthella lenta	99.98
35	Eggerthella lenta St35	2	1	3547202	3550972	3547202	100	0	0	NR_074377.1	Eggerthella lenta strain DSM 2243	100	GCA_003340005.1	Eggerthella lenta	99.98
36	Christensenellaceae St36	1	0	2768447	2768447	2768447	98.79	0.81	0	NR_144743.1	Christensenella timonensis strain Marseille-P2437	97.668	GCA_900087015.1	Christensenella timonensis	88.3
37	Christensenellaceae St37	1	0	2768446	2768446	2768446	98.79	0.81	0	NR_144743.1	Christensenella timonensis strain Marseille-P2437	97.668	GCA_900087015.1	Christensenella timonensis	88.3
38	Desulfovibrionaceae St38	2	1	3403886	3458893	3403886	99.41	0	0	NR_104990.1	Desulfovibrio desulfuricans strain Essex 6	97.017	GCA_001553605.1	Desulfovibrio fairfieldensis	99.51
39	Desulfovibrionaceae St39	31	0	3403882	3484255	3403882	99.41	0	0	NR_104990.1	Desulfovibrio desulfuricans strain Essex 6	97.017	GCA_001553605.1	Desulfovibrio fairfieldensis	99.51
40	Ruminococcaceae St40	1	0	4308696	4308696	4308696	100	0.27	0	NR_029356.1	Flavonifractor plautii strain 265	96.272	GCA_900549565.1	uncultured Clostridiales bacterium	98.79
41	Ruminococcaceae St41	1	0	4308521	4308521	4308521	100	0.27	0	NR_029356.1	Flavonifractor plautii strain 265	96.272	GCA_900549565.1	uncultured Clostridiales bacterium	98.79
42	Ruminococcaceae St42	1	0	3674121	3674121	3674121	99.33	0	0	NR_147370.1	Pseudoflavonifractor phocaeensis strain Marseille-P3064	95.33	GCA_900066895.1	uncultured Flavonifractor sp.	100
43	Ruminococcaceae St43	1	0	3230334	3230334	3230334	98.66	0.67	0	NR_029356.1	Flavonifractor plautii strain 265	95.346	GCA_900543935.1	uncultured Clostridiales bacterium	98.59
44	Ruminococcaceae St44	2	1	3756698	3762660	3756698	98.64	0	0	NR_151900.1	Ruthenibacterium lactatiformans strain 585-1	95.01	GCA_900543285.1	uncultured Ruminococcaceae bacterium	99.37
45	Ruminococcaceae St45	2	1	3583399	3676538	3583399	99.33	0.67	0	NR_147398.1	Anaerotruncus rubiinfantis strain MT15	95.168	GCA_900548065.1	uncultured Anaerotruncus sp.	99.97
46	Clostridiales St46	3	2	3567309	3581042	3567309	98.66	1.01	0	NR_044425.1	Hydrogenoanaerobacterium saccharovorans strain SW512	91.372	GCA_900113995.1	Ruminococcaceae bacterium D5	99.78
47	Clostridiales St47	2	1	3617283	3622566	3617283	98.66	1.01	0	NR_044425.1	Hydrogenoanaerobacterium saccharovorans strain SW512	91.372	GCA_900113995.1	Ruminococcaceae bacterium D5	99.78
48	Emergencia timonensis St48	1	0	4364341	4364341	4364341	99.29	0.71	0	NR_144737.1	Emergencia timonensis strain SN18	99.865	GCA_003472745.1	Emergencia timonensis	100
49	Emergencia timonensis St49	1	0	4364332	4364332	4364332	99.29	0.71	0	NR_113132.1	Clostridioides difficile ATCC 9689	99.865	GCA_003472745.1	Emergencia timonensis	100
50	Clostridioides difficile St50	1	0	4293712	4293712	4293712	99.51	0.78	0	NR_029164.1	[Clostridium] innocuum strain B-3	99.932	GCA_000210395.1	Clostridioides difficile M68	100
51	Clostridium innocuum St51	1	0	5051129	5051129	5051129	100	0	0	NR_026111.1	Phascolarctobacterium faecium ACM 3679	98.103	GCA_002221705.2	[Clostridium] innocuum	100
52	Phascolarctobacterium faecium St52	1	0	2443026	2443026	2443026	100	1.5	0	NR_026111.1	Phascolarctobacterium faecium ACM 3679	98.416	GCA_000980215.1	Carnobacterium sp. N15.MGS-207	99.52
53	Phascolarctobacterium faecium St53	1	0	2442988	2442988	2442988	100	1.5	0	NR_026111.1	Phascolarctobacterium faecium ACM 3679	98.35	GCA_000980215.1	Carnobacterium sp. N15.MGS-207	99.52
54	Hungatella hathewayi St54	2	1	7287448	7442505	7287448	99.37	0.95	66.67	NR_036928.1	Hungatella hathewayi strain 1313	99.162	GCA_003463705.1	Hungatella hathewayi	99.99
55	Hungatella hathewayi St55	15	1	4503658	7422067	4503658	99.37	0.95	66.67	NR_036928.1	Hungatella hathewayi strain 1313	99.162	GCA_003463705.1	Hungatella hathewayi	99.99
56	Lachnospiraceae St56	1	0	7291680	7291680	7291680	98.85	2.49	0	NR_144731.1	Eisenbergiella massiliensis strain AT11	97.862	GCA_003478085.1	Eisenbergiella sp. OF01-20	99.59
57	Lachnospiraceae St57	5	0	7184155	7291305	7184155	98.85	2.49	0	NR_144731.1	Eisenbergiella massiliensis strain AT11	97.862	GCA_003478085.1	Eisenbergiella sp. OF01-20	99.58
58	Lachnospiraceae St58	6	1	5900968	7965137	5900968	98.85	3.74	0	NR_144731.1	Eisenbergiella massiliensis strain AT11	97.592	GCA_001722585.1	Eisenbergiella tayi	99.54
59	Clostridium scindens St59	1	0	3608085	3608085	3608085	99.42	0	0	NR_028785.1	[Clostridium] scindens ATCC 35704	99.935	GCA_000154505.1	[Clostridium] scindens ATCC 35704	99.99
60	Clostridium scindens St60	1	0	3608087	3608087	3608087	99.42	0	0	NR_028785.1	[Clostridium] scindens ATCC 35704	99.935	GCA_000154505.1	[Clostridium] scindens ATCC 35704	99.99
61	Lachnospiraceae St61	1	0	4158096	4158096	4158096	98.73	0	0	NR_144610.1	Extibacter muris strain 40cc-B-5824-ARE	96.108	GCA_003464355.1	Clostridium sp. AF15-17LB	96.92
62	Lachnospiraceae St62	1	0	4158097	4158097	4158097	98.73	0	0	NR_144610.1	Extibacter muris strain 40cc-B-5824-ARE	96.108	GCA_003464355.1	Clostridium sp. AF15-17LB	96.92
63	Clostridium hylemonae St63	1	0	3922038	3922038	3922038	98.83	0	0	NR_024719.1	[Clostridium] hylemonae strain TN-272	99.448	GCA_000156515.1	[Clostridium] hylemonae DSM 15053	99.54
64	Faecalicatena contorta St64	2	1	5014629	5055003	5014629	99.42	0	0	NR_104803.1	Faecalicatena contorta DSM 3982	99.539	GCA_003434075.1	Faecalicatena contorta	100
65	Clostridium symbiosum St65	1	0	5386273	5386273	5386273	99.37	0	0	NR_118730.1	[Clostridium] symbiosum ATCC 14940	98.366	GCA_001406475.1	[Clostridium] symbiosum	99.97
66	Clostridium symbiosum St66	1	0	5384495	5384495	5384495	99.37	0	0	NR_118730.1	[Clostridium] symbiosum ATCC 14940	98.366	GCA_001406475.1	[Clostridium] symbiosum	99.97
67	Methanobrevibacter smithii St67	1	0	1791153	1791153	1791153	100	0	0	NR_074235.1	Methanobrevibacter smithii ATCC 35061	99.932	GCA_000824705.1	Methanobrevibacter smithii	99.82
68	Methanobrevibacter smithii St68	1	0	1791155	1791155	1791155	100	0	0	NR_074235.1	Methanobrevibacter smithii ATCC 35061	99.932	GCA_000824705.1	Methanobrevibacter smithii	99.81
