# Supplementary material for: Identification of unique bile acid-metabolizing bacteria from the microbiome of centenarians
Source: Research Square preprint supplement (doi:10.21203/rs.3.rs-115113/v1), 2020-12-02
Supplement: Supplementary file 4 [file d2066d483172ac68b7eb15da.xlsx]

## Sheet: Sheet1
Table S2: Bile acid coumpounds measured by LC-MS/MS
Abbreviation	Chemical name	Chemical formula	CAS
CDCA	Chenodeoxycholic acid	C24H40O4	474-25-9
CDCA3S	Chenodeoxycholic acid 3-sulfate	C24H40O7S	na
TCDCA	Tauro-chenodeoxycholic acid (sodium salt)	C26H44NNaO6S	6009-98-9
GCDCA	Glyco-chenodeoxycholic acid (sodium salt)	C26H42NNaO5	16564-43-5
3-Oxo-Δ4-CDCA	3-Oxo-4-cholenoic acid	C24H36O3	1452-29-5
3-Oxo-Δ4,6-CDCA	3-Oxo-4,6-choladienoic acid	C24H34O3	88179-71-9
LCA	Lithocholic acid	C24H40O3	434-13-9
LCA3S	Lithocholic acid 3-sulfate (disodium salt)	C24H38Na2O6S	64936-81-8
TLCA	Trauro-lithocholic acid (sodium salt)	C26H44NNaO5S	6042-32-6
TLCA3S	Taurolithocholic acid 3-sulfate (disodium salt)	C26H43NNa2O8S2	64936-83-0
IsoLCA	Iso-lithocholic acid	C24H40O3	1534-35-6
IsoalloLCA	Iso-allo-lithocholic acid	C24H40O3	2276-93-9
3-OxoLCA	3-Oxo-lithocholic acid	C24H38O3	1553-56-6
7-OxoLCA	7-Oxo-lithocholic acid	C24H38O4	4651-67-6
UDCA	Ursodeoxycholic acid	C24H40O4	128-13-2
UDCA3S	Ursodeoxycholic acid 3-sulfate	C24H40O7S	na
TUDCA	Tauro-ursodeoxycholic acid (sodium salt)	C26H44NNaO6S	35807-85-3
IsoCDCA	Iso-chenodeoxycholic acid	C24H40O4	566-24-5
IsoDCA	Iso-deoxycholic acid	C24H40O4	570-63-8
3-OxoCDCA	3-Oxo-chenodeoxycholic acid	C24H38O4	4185-00-6
3-OxoDCA	3-Oxo-deoxycholic acid	C24H38O4	4185-01-7
CA	Cholic acid	C24H40O5	81-25-4
CA3S	Cholic acid 3-sulfate	C24H40O8S	na
TCA	Tauro-cholic acid	C26H45NO7S	81-24-3
GCA	Glyco-cholic acid (sodium salt)	C26H42NNaO6	863-57-0
IsoCA	Iso-cholic acid	C24H40O5	3338-16-7
3-OxoCA	3-Oxo-cholic acid	C24H38O5	2304-89-4
7-OxoDCA	7-Oxo-deoxycholic acid	C24H38O5	911-40-0
DCA	Deoxycholic acid (sodium salt)	C24H39NaO4	302-95-4
DCA3S	Deoxycholic acid 3-sulfate	C23H38O7S	na
TDCA	Tauro-deoxycholic acid (sodium salt)	C26H44NNaO6S	1180-95-6
GDCA	Glyco-deoxycholic acid	C26H43NO5	360-65-6
UCA	Ursocholic acid	C24H40O5	2955-27-3
Δ5-3β-OH	3β-Hydroxy-5-cholenoic acid	C24H38O3	5255-17-4
HCA	Hyocholic acid	C24H40O5	547-75-1
HDCA	Hyodeoxycholic acid	C24H40O4	83-49-8
MDCA	Murideoxycholic acid	C24H40O4	668-49-5
