# Supplementary material for: Identification of unique bile acid-metabolizing bacteria from the microbiome of centenarians
Source: Research Square preprint supplement (doi:10.21203/rs.3.rs-115113/v1), 2020-12-02
Supplement: Supplementary file 5 [file 4451dac76197fc9fd9ce20ba.xlsx]

## Sheet: Sheet1
Table S4: The primer sets used for P. merdae St3 mutagenesis
Primer name	Sequence (5' - 3')
5AR-upstream-Fw	GTGGATCCCCCGGGCTGCACCGTATCGTCCCAAAGTTGT
5AR-upstream-Rv	TCTAATTGTTATGATTAACTCATAATAGAT
5AR-downstream-Fw	AGTTAATCATAACAATTAGAAATAAGGTGA
5AR-downstream-Rv	CTGGAAGATAGGCAATTAGGTAAGCTGGCGCTTGAAATC
5AR-check#1-Fw	TTGGCGTTCATCAGTTCAAG
5AR-check#2-Rv	ACCCTGACTCCGATGTTGAG
5AR-check#3-Fw	GCTCAGACGGGATCATGAAC
5AR-check#4-Rv	ATCCTGGCAATGGTCGATGA
5BR-upstream-Fw	GTGGATCCCCCGGGCTGCAAGTTCGCGACGGTCTTTCTT
5BR-upstream-Rv	CATAATAGATTGGAAAAAGGATTAGCCATC
5BR-downstream-Fw	CCTTTTTCCAATCTATTATGAGTTAATCAT
5BR-downstream-Rv	CTGGAAGATAGGCAATTAGGCCCGGAATCAACTGAAGGA
5BR-check#1-Fw	CGTCTTCCGGATCCTCGAAG
5BR-check#2-Rv	GCTATGGCTTTGCGTAACCG
5BR-check#3-Fw	AATACGGCATCCTGGTTGCA
5BR-check#4-Rv	CGCTTGGTGGACATTTGCAA
3bHSDH-upstream-Fw	GTGGATCCCCCGGGCTGCAGGATGAAAGCGATTGCCGAC
3bHSDH-upstream-Rv	AATATAAGTAACCGGCATGCACTTTTAGTT
3bHSDH-downstream-Fw	GCATGCCGGTTACTTATATTCTAATTTCTC
3bHSDH-downstream-Rv	CTGGAAGATAGGCAATTAGACGCCCTGCAGATCATATGG
3bHSDH-check#1-Fw	CTGGTGTCCTCCTTGTCGTC
3bHSDH-check#2-Rv	TTTGCTTACGTTGCTGTGCC
3bHSDH-check#3-Fw	TTTCCCATCACACGTACGGG
3bHSDH-check#4-Rv	CAAAAGCGTTCGGACAAGCA
